# Supplementary material
Source: PubMed Central journal article supplement (PMC5718184)

Aggrecan

TUNEL

Dapi

Merge

Day 5

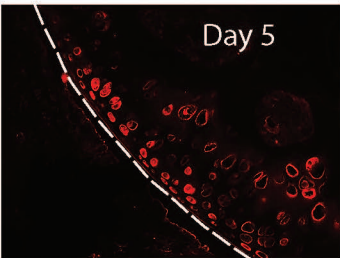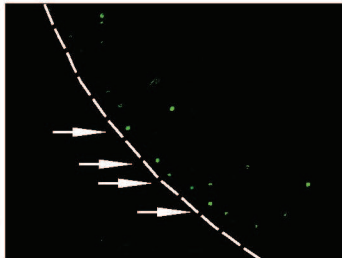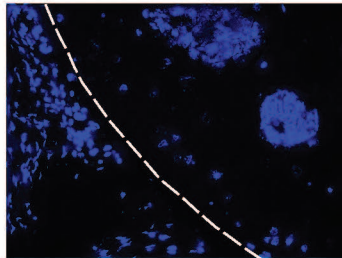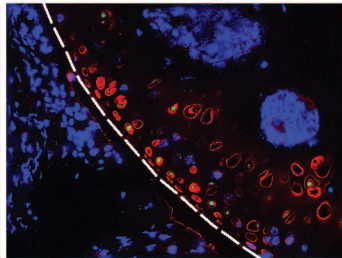

Day 14

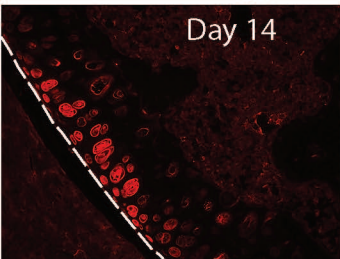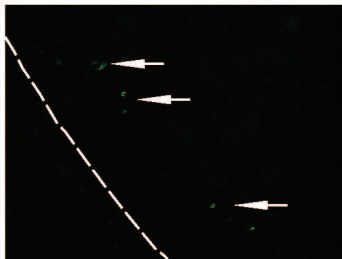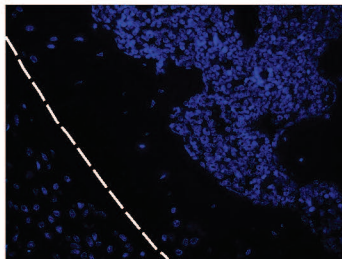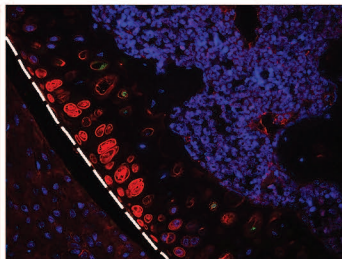

Non-loaded

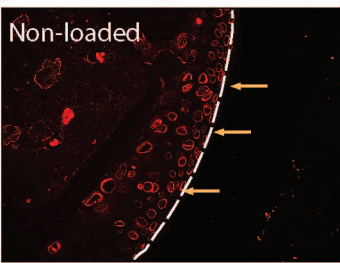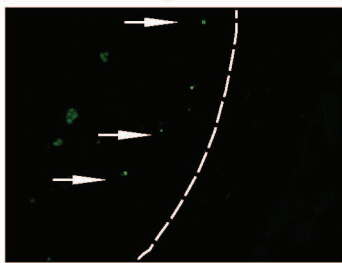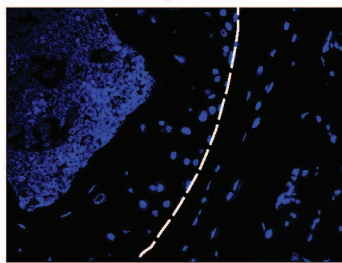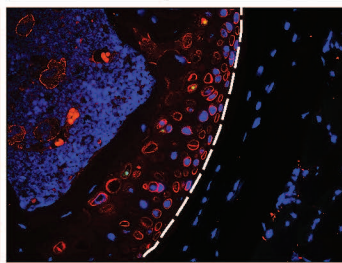

Supplement: NIHMS657130-supplement-Figure_S2__Spilt_channels_of_Figure_2A.pdf [file NIHMS657130-supplement-Figure_S2__Spilt_channels_of_Figure_2A.pdf]

## Day 5 TUNEL positive-cell counts in non-calcified injured cartilage

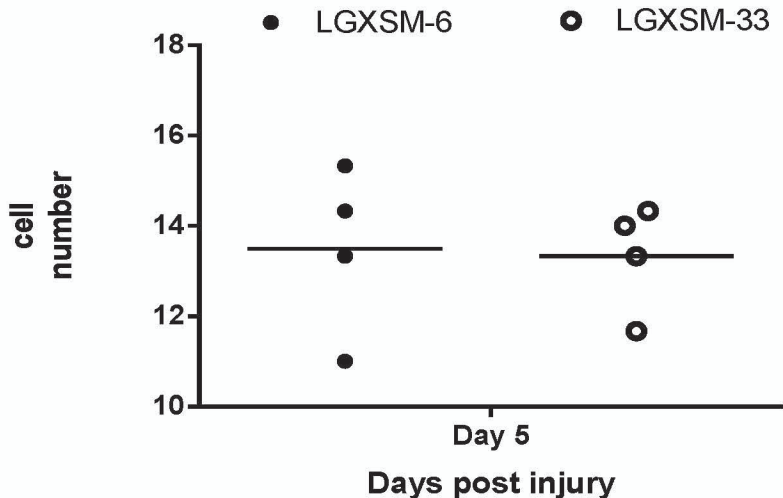

Supplement: NIHMS657130-supplement-Figure_S3__Quantification_of_TUNEL-positive_cells.pdf [file NIHMS657130-supplement-Figure_S3__Quantification_of_TUNEL-positive_cells.pdf]
